# Supplementary material for: Probing the importance of planar surfaces and crystal edges for electron transfer within iron-bearing clays
Source: Royal Society of Chemistry journal article supplement (doi:10.1039/c4ra04521a), 2014-01-01
Supplement: c4ra04521a1.pdf [file c4ra04521a1.pdf]

## Electronic Supplementary Information

### Probing the Importance of Planar Surfaces and Crystal Edges for Electron Transfer within Iron-bearing Clays

Zhaohui Wang

*College of Environmental Science and Engineering, Donghua University, Shanghai,  
201620, China*

\*Corresponding author: [zhaohuiwang@dhu.edu.cn](mailto:zhaohuiwang@dhu.edu.cn)

#### **2 Figures**

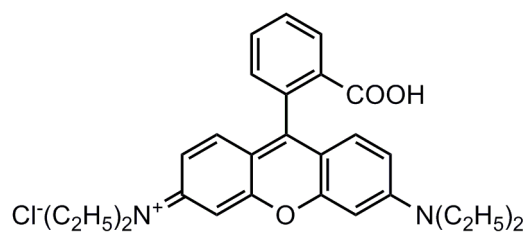

**ESI-Fig. 1.** Chemical structure of RhB.

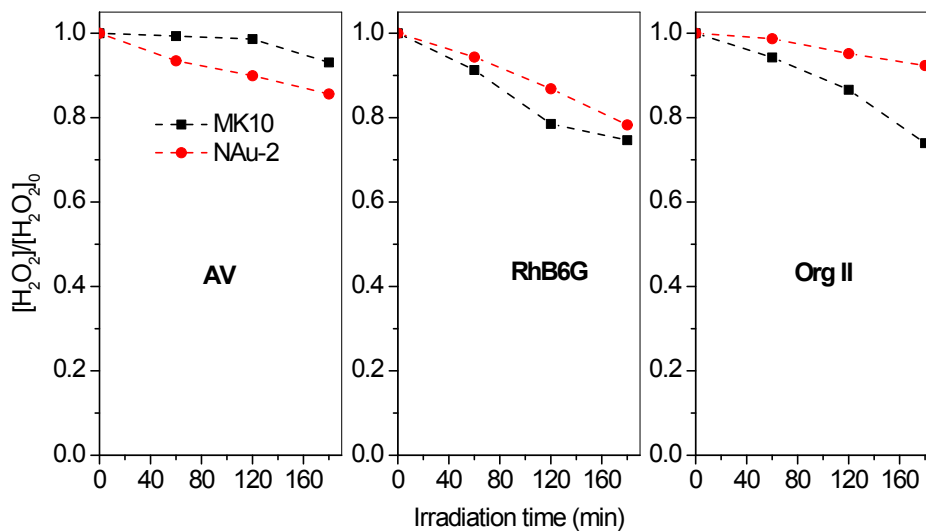

**ESI-Fig. 2.** Comparison of the photoreduction kinetics of  $\text{H}_2\text{O}_2$  catalyzed by 0.3 g/L MK10 and NAu-2 in the presence of 20  $\mu\text{M}$  alizarine violet 3B (AV), rhodamine 6G (Rh6G) or orange II (Org II).  $\text{H}_2\text{O}_2$ , 40  $\mu\text{M}$ ; pH, 7.0.
